# Supplementary material for: DNA-interacting properties of two analogous square-planar cis-chlorido complexes: copper versus palladium
Source: PubMed Central journal article supplement (PMC8437883; doi:10.1007/s00775-021-01888-2), 2021-08-28
Supplement: 775_2021_1888_MOESM1_ESM.pdf [file 775_2021_1888_MOESM1_ESM.pdf]

## Supplementary Information

### DNA-interacting properties of two analogous square-planar *cis*-chlorido complexes: copper *versus* palladium

Marcos V. Palmeira-Mello<sup>a,b,c</sup>, Ana B. Caballero<sup>b,\*</sup>, Aida Lopez Espinar<sup>b</sup>,  
Guilherme P. Guedes<sup>a</sup>, Amparo Caubet<sup>b</sup>, Alessandra M. Teles de Souza<sup>c</sup>,  
Mauricio Lanznaster<sup>a</sup> and Patrick Gamez<sup>b,d,e</sup>

<sup>a</sup> *Instituto de Química, Universidade Federal Fluminense, Outeiro S. João Batista S/N, 24020-141, Niterói RJ, Brazil.*

<sup>b</sup> *nanoBIC, Departament de Química Inorgànica I Orgànica, Secció Química Inorgànica, Universitat de Barcelona, Martí i Franquès 1-11, 08028 Barcelona, Spain.*

<sup>c</sup> *Laboratório de Modelagem Molecular & QSAR (ModMolQSAR), Faculdade de Farmácia, Universidade Federal do Rio de Janeiro, Rio de Janeiro, RJ, Brazil.*

<sup>d</sup> *Institute of Nanoscience and Nanotechnology (IN2UB), Universitat de Barcelona, 08028 Barcelona, Spain.*

<sup>e</sup> *Catalan Institution for Research and Advanced Studies (ICREA), Passeig Lluís Companys 23, 08010 Barcelona, Spain.*

\*Corresponding author: Ana B. Caballero, [ana.caballero@ub.edu](mailto:ana.caballero@ub.edu)

## Index of Figures and Tables

**Fig. S1** Infrared spectrum (diamond/ZnSe ATR) of **1**.

**Fig. S2** Infrared spectrum (diamond/ZnSe ATR) of **2**.

**Fig. S3**  $^1\text{H}$  NMR spectrum of **2** in DMSO- $d_6$  and zoom of the region 9.0–4.4 ppm (inset).

**Fig. S4** ESI-MS spectrum of **1**.

**Fig. S5** ESI-MS spectrum of **2**.

**Fig. S6** UV-Visible spectra of **1** in DMSO at different concentrations.

**Fig. S7** UV-Visible spectra of **2** in DMSO at different concentrations.

**Fig. S8** UV-Visible monitoring of **1** (50  $\mu\text{M}$ ) in cacodylate–NaCl buffer containing 1% DMSO during 1 h at room temperature.

**Fig. S9** UV-Visible monitoring of **2** (50  $\mu\text{M}$ ) in cacodylate–NaCl buffer containing 1% DMSO during 24 h at room temperature.

**Fig. S10**  $^1\text{H}$  NMR spectra of **2** in DMSO and DMSO/ $\text{D}_2\text{O}$  after 0, 1 and 24 h at 37  $^\circ\text{C}$ .

**Fig. S11** Fluorescence emission spectra of the DNA–EB complex in the absence and presence of increasing amounts of complex **1**,  $[\text{EB}] = 75 \mu\text{M}$ ,  $[\text{DNA}] = 15 \mu\text{M}_{\text{bp}}$ ,  $[\text{Complex}] = 0\text{--}50 \mu\text{M}$ ,  $\lambda_{\text{ex}} = 514 \text{ nm}$ .

**Fig. S12** Fluorescence emission spectra of the DNA–EB complex in the absence and presence of increasing amounts of complex **2**,  $[\text{EB}] = 75 \mu\text{M}$ ,  $[\text{DNA}] = 15 \mu\text{M}_{\text{bp}}$ ,  $[\text{Complex}] = 0\text{--}50 \mu\text{M}$ ,  $\lambda_{\text{ex}} = 514 \text{ nm}$ .

**Fig. S13** Binding-mode analysis of the two enantiomers of  $[\text{Cu}(\text{CPYA})(\text{H}_2\text{O})_2]^{2+}$  (**1a**) (top) and  $[\text{Pd}(\text{CPYA})(\text{H}_2\text{O})_2]^{2+}$  (**2a**) (bottom) with the DNA (PDB: 1BNA). The enantiomers **1aR**, **1aS**, **2aR** and **2aS** are shown in cyan, yellow, white and pink, respectively. Hydrogen bonds are colored in orange. Metal-ligand bonds are colored in gray.

**Table S1** Summary of crystal data, collection and refinement of complexes  $[\text{Cu}(\text{CPYA})\text{Cl}_2]$  (**1**) and  $[\text{Pd}(\text{CPYA})\text{Cl}_2]$  (**2**).

**Table S2** Selected bond lengths ( $\text{\AA}$ ) and angles ( $^\circ$ ) for complexes  $[\text{Cu}(\text{CPYA})\text{Cl}_2]$  (**1**) and  $[\text{Pd}(\text{CPYA})\text{Cl}_2]$  (**2**).

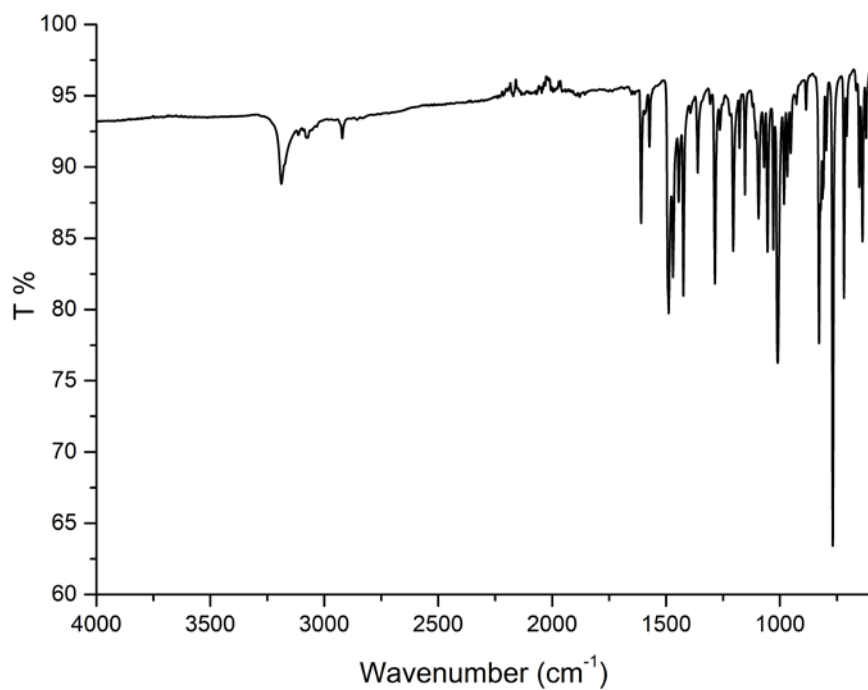

**Fig. S1** Infrared spectrum (diamond/ZnSe ATR) of 1.

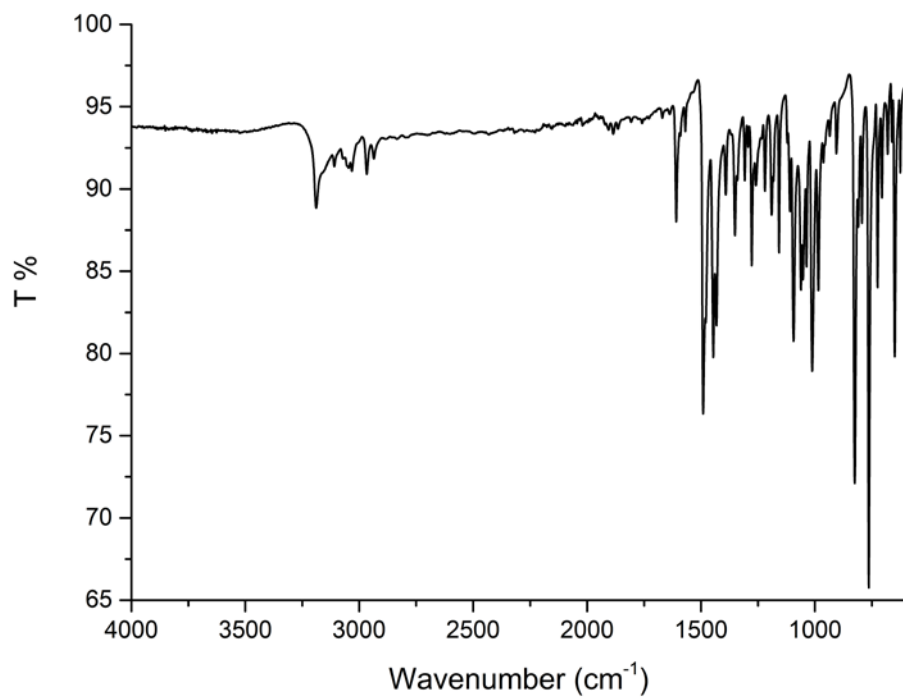

**Fig. S2** Infrared spectrum (diamond/ZnSe ATR) of 2.

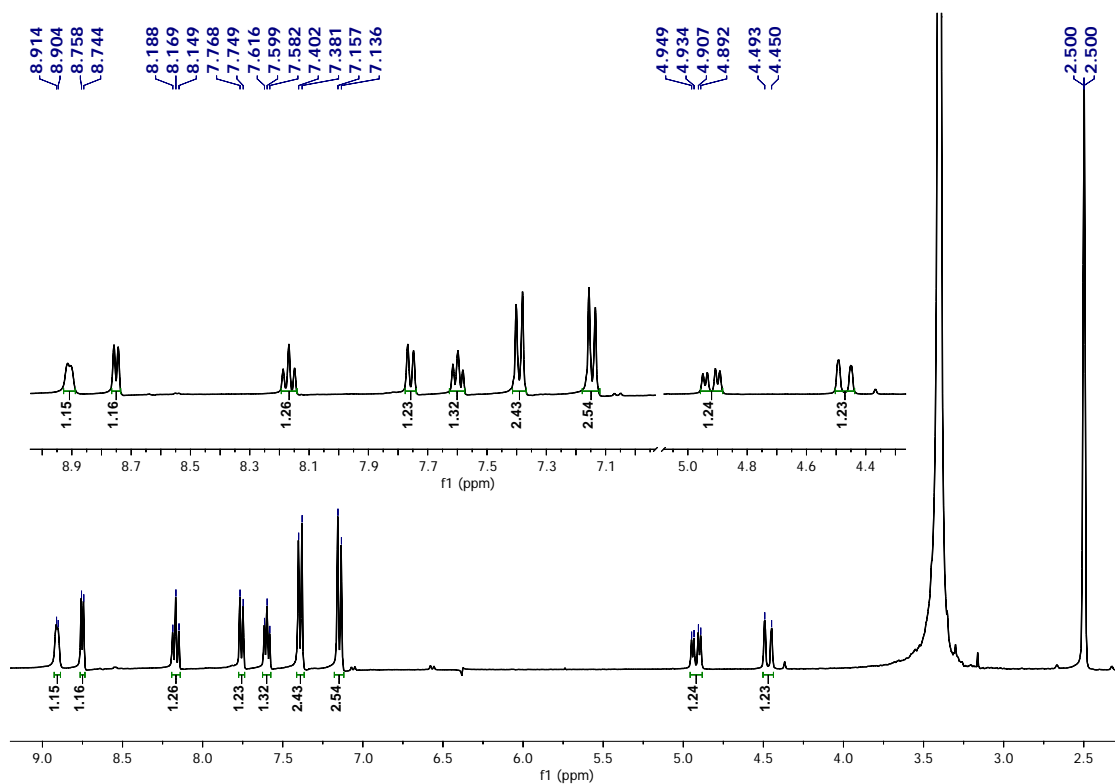

**Fig. S3**  $^1\text{H}$  NMR spectrum of **2** in  $\text{DMSO-d}_6$  and zoom of the region 9.0–4.4 ppm (inset).

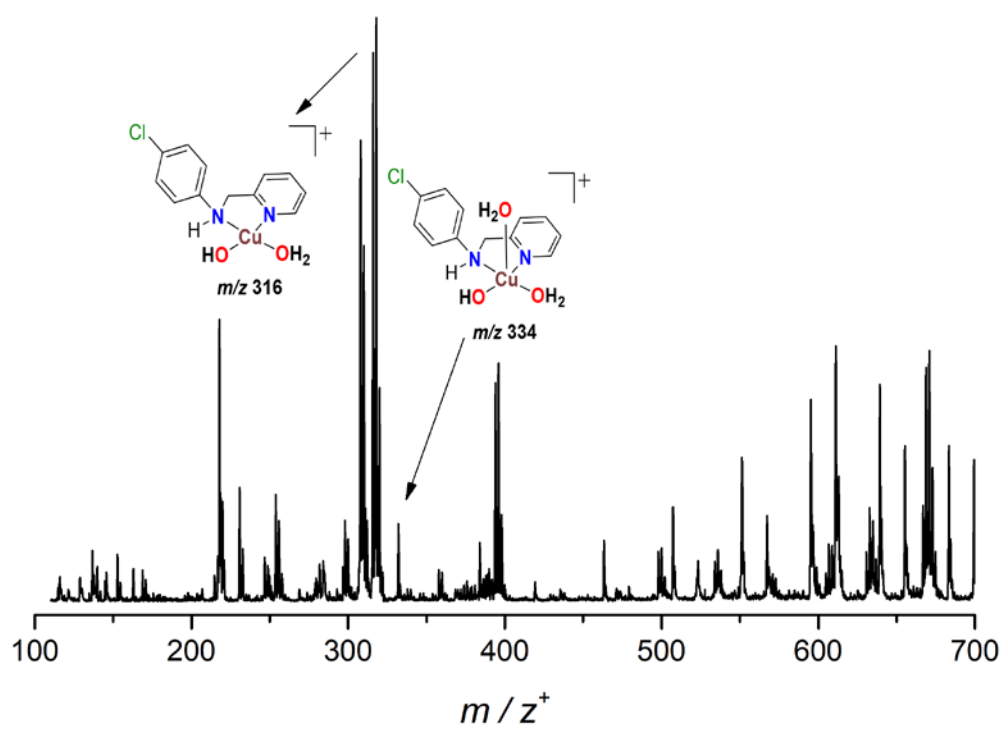

**Fig. S4** ESI-MS spectrum of **1**.

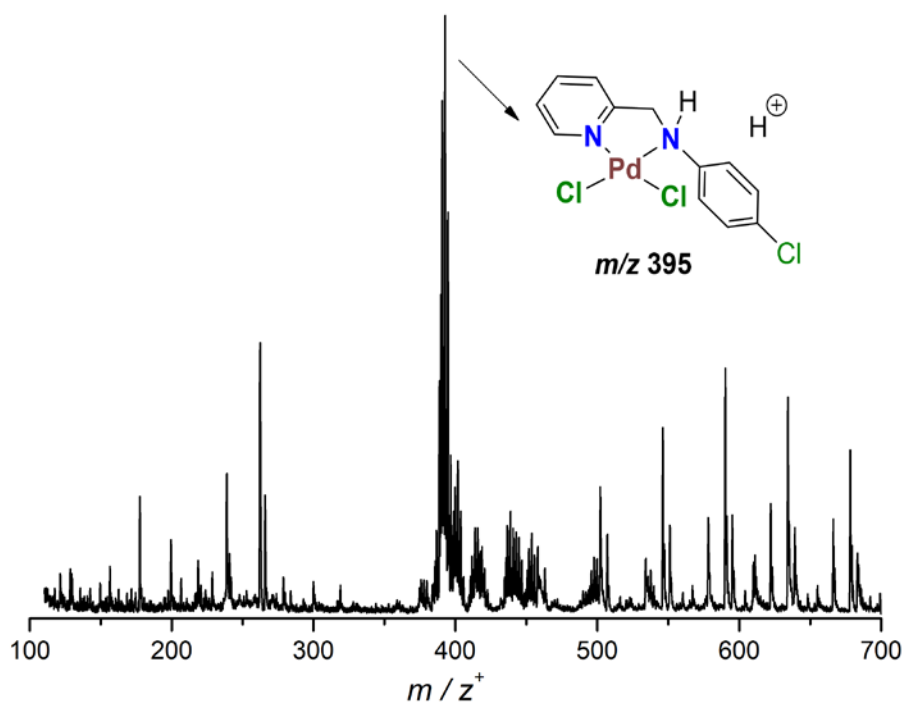

**Fig. S5** ESI-MS spectrogram of 2.

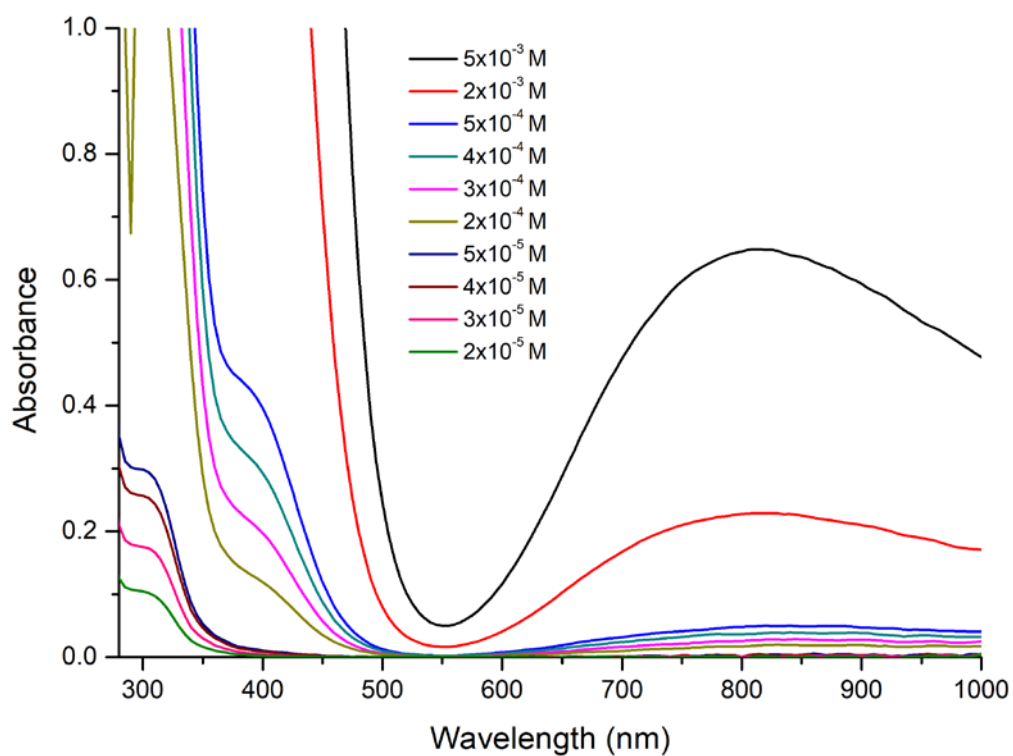

**Fig. S6** UV-Visible spectra of 1 in DMSO at different concentrations.

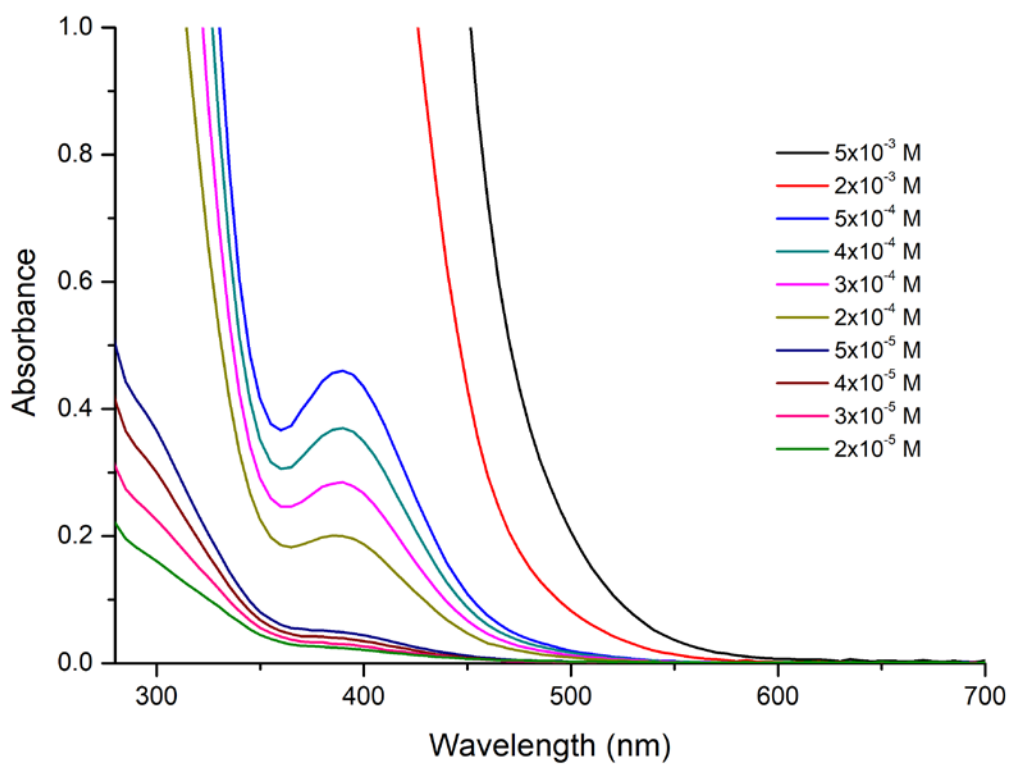

**Fig. S7** UV-Visible spectra of **2** in DMSO at different concentrations.

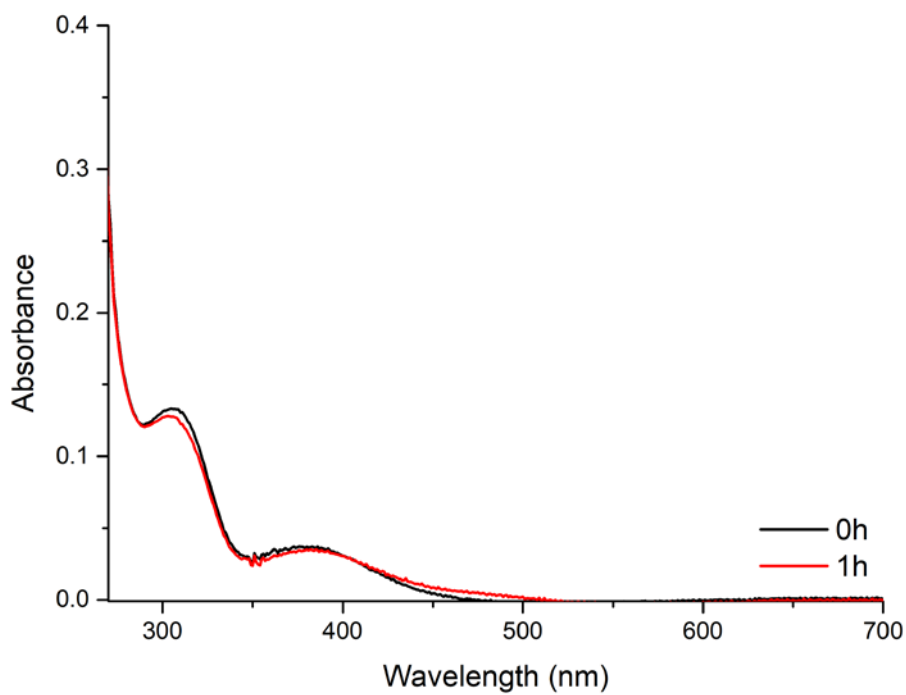

**Fig. S8** UV-Visible monitoring of **1** (50  $\mu\text{M}$ ) in cacodylate-NaCl buffer containing 1% DMSO during 1 h at room temperature.

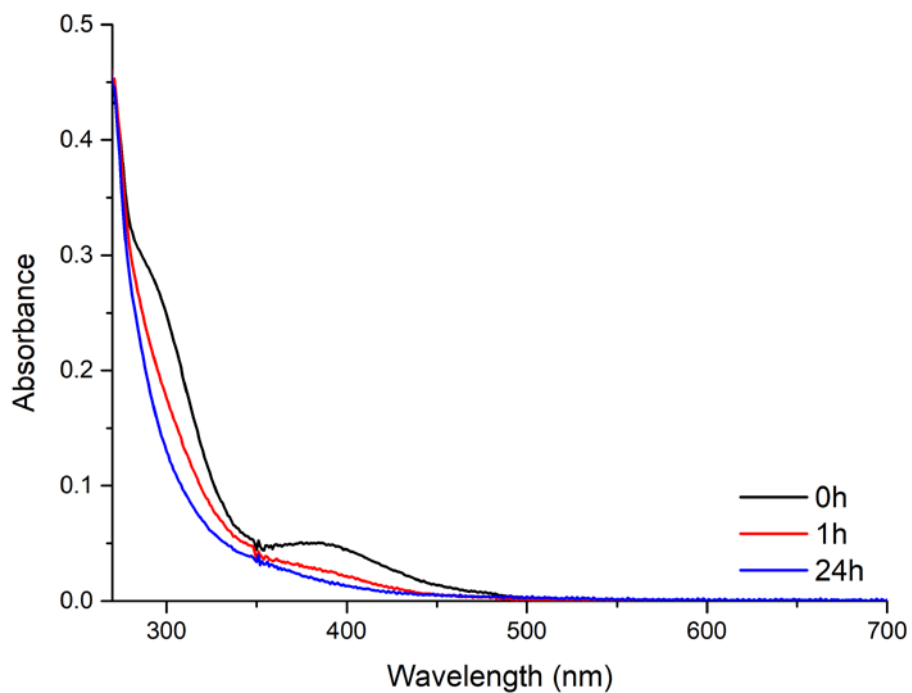

**Fig. S9** UV-Visible monitoring of **2** (50  $\mu$ M) in cacodylate–NaCl buffer containing 1% DMSO during 24 h at room temperature.

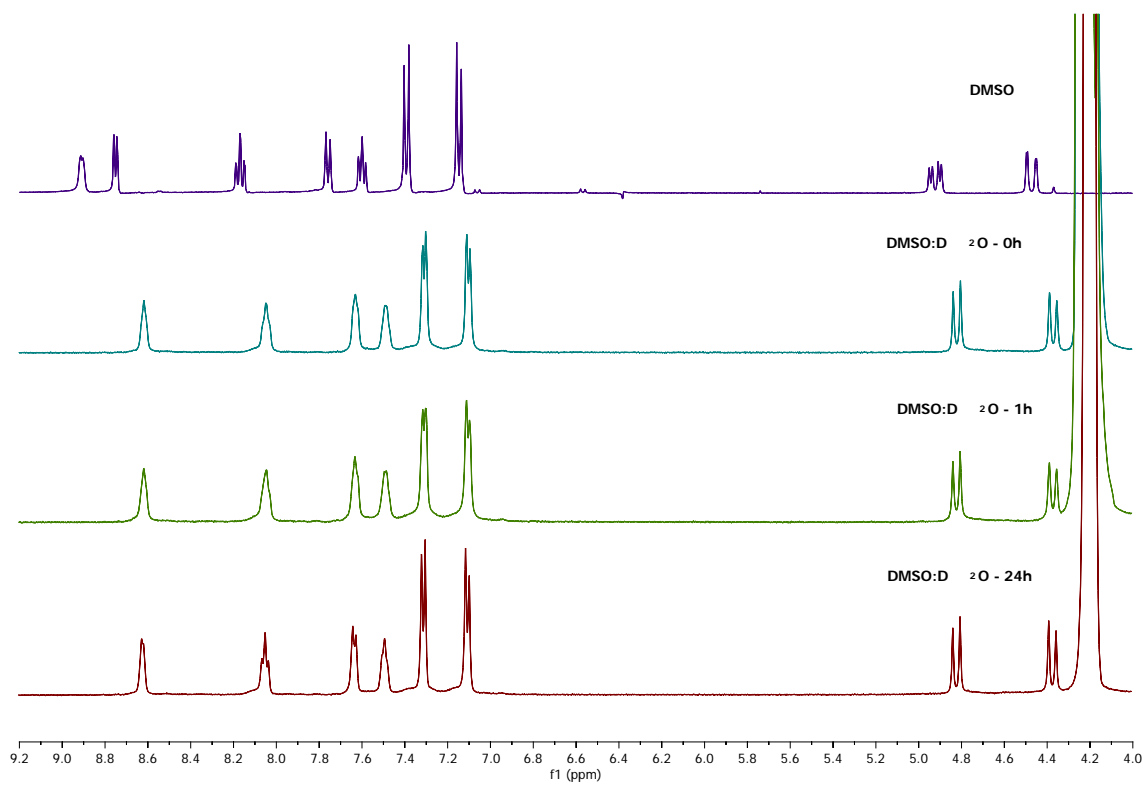

**Fig. S10**  $^1\text{H}$  NMR spectra of **2** in DMSO and DMSO/ $\text{D}_2\text{O}$  after 0, 1 and 24 h at 37  $^\circ\text{C}$ .

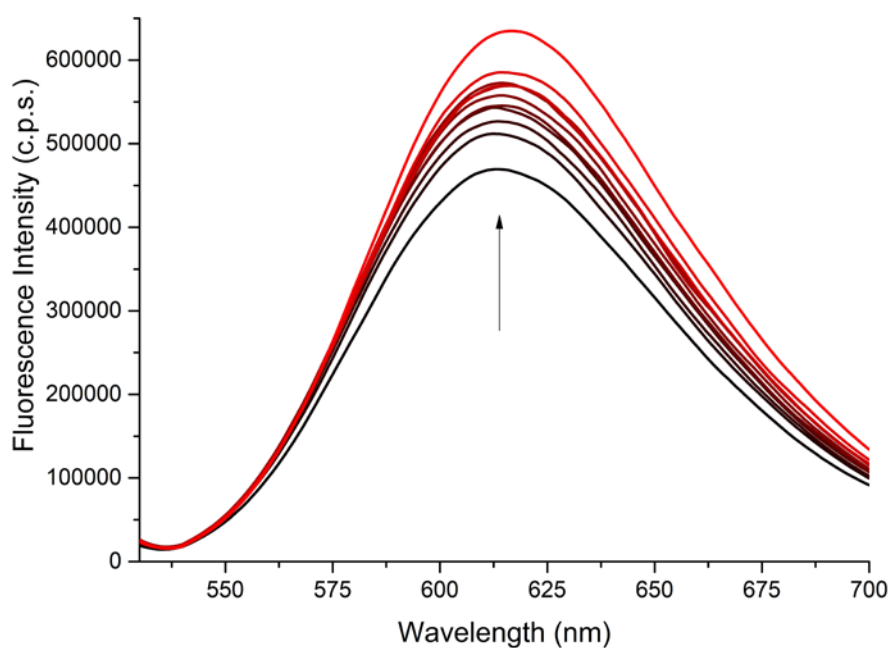

**Fig. S11** Fluorescence emission spectra of the DNA-EB complex in the absence and presence of increasing amounts of complex **1**, [EB] = 75  $\mu$ M, [DNA] = 15  $\mu$ M, [Complex] = 0–50  $\mu$ M,  $\lambda_{ex}$  = 514 nm.

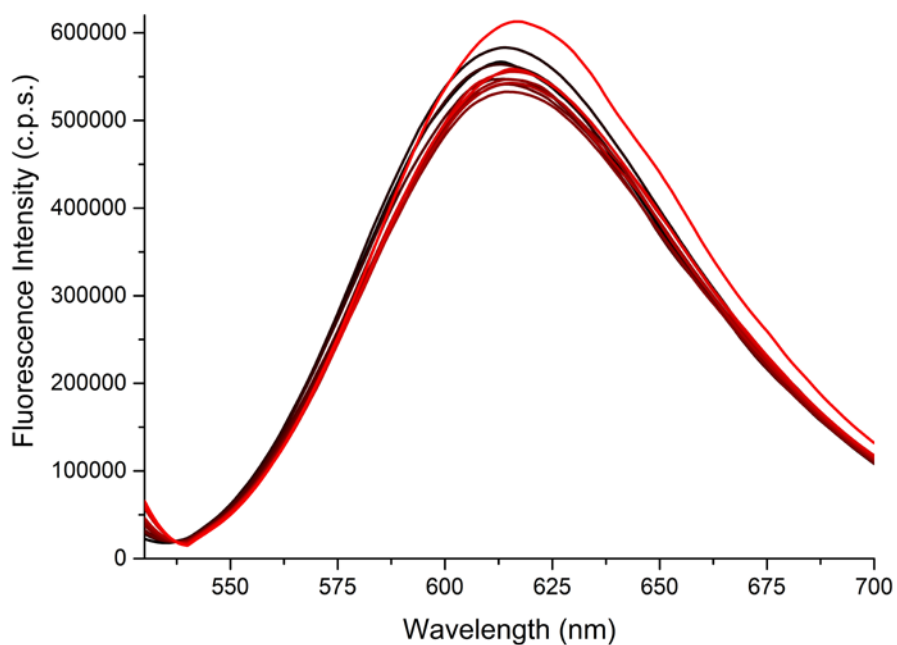

**Fig. S12** Fluorescence emission spectra of the DNA-EB complex in the absence and presence of increasing amounts of complex **2**, [EB] = 75  $\mu$ M, [DNA] = 15  $\mu$ M, [Complex] = 0–50  $\mu$ M,  $\lambda_{ex}$  = 514 nm.



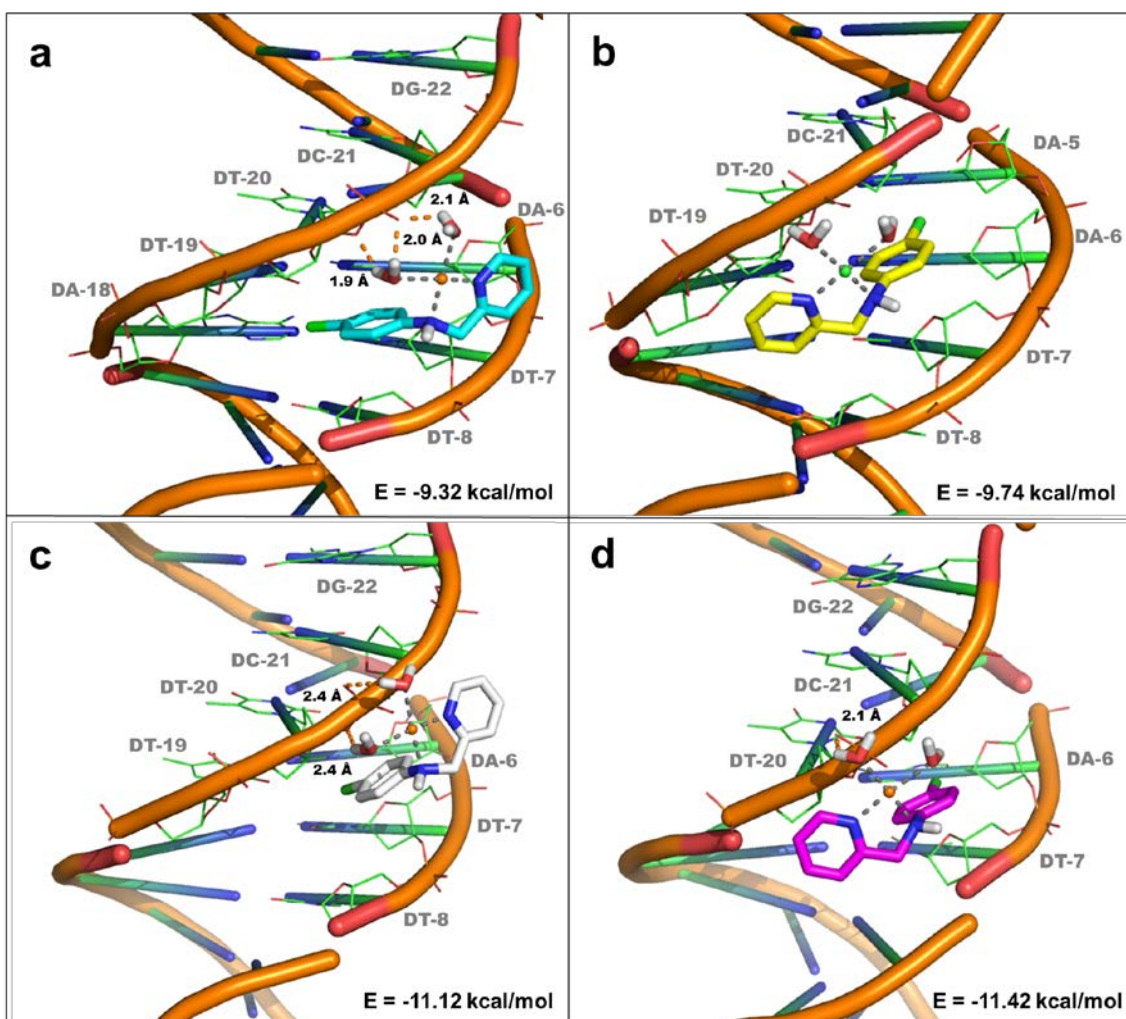

**Fig. S13** Binding-mode analysis of the two enantiomers of  $[\text{Cu}(\text{CPYA})(\text{H}_2\text{O})_2]^{2+}$  (**1a**) (top) and  $[\text{Pd}(\text{CPYA})(\text{H}_2\text{O})_2]^{2+}$  (**2a**) (bottom) with the DNA (PDB: 1BNA). The enantiomers **1aR**, **1aS**, **2aR** and **2aS** are shown in cyan, yellow, white and pink, respectively. Hydrogen bonds are colored in orange. Metal-ligand bonds are colored in gray.

**Table S1** Summary of crystal data, collection and refinement of complexes [Cu(CPYA)Cl<sub>2</sub>] (**1**) and [Pd(CPYA)Cl<sub>2</sub>] (**2**).

|                                                       | <i>Complex 1</i>                                                                                 | <i>Complex 2</i>                                                                            |
|-------------------------------------------------------|--------------------------------------------------------------------------------------------------|---------------------------------------------------------------------------------------------|
| Empirical formula                                     | C <sub>12</sub> H <sub>11</sub> Cl <sub>3</sub> CuN <sub>2</sub>                                 | C <sub>12</sub> H <sub>11</sub> Cl <sub>3</sub> N <sub>2</sub> Pd· CH <sub>3</sub> CN       |
| Formula weight (g.mol <sup>-1</sup> )                 | 353.12                                                                                           | 437.03                                                                                      |
| Crystal system                                        | Monoclinic                                                                                       | Monoclinic                                                                                  |
| Space group                                           | P2 <sub>1</sub> /c                                                                               | P2 <sub>1</sub> /c                                                                          |
| Temperature (K)                                       | 298                                                                                              | 298                                                                                         |
| Wavelength                                            | Mo Kα                                                                                            | Mo Kα                                                                                       |
| Unit cell dimensions (Å,°)                            | a = 12.2234 (13)<br>b = 14.8800 (14)<br>c = 7.7366 (6)<br>α = 90°<br>β = 105.775 (4)°<br>γ = 90° | a = 10.744 (4)<br>b = 9.369 (3)<br>c = 16.417 (6)<br>α = 90°<br>β = 92.169 (13)°<br>γ = 90° |
| Volume (Å <sup>3</sup> )                              | 1354.2 (2)                                                                                       | 1651.4 (10)                                                                                 |
| Z                                                     | 4                                                                                                | 4                                                                                           |
| D <sub>x</sub> (Mg/m <sup>3</sup> )                   | 1.732                                                                                            | 1.758                                                                                       |
| Absorption coefficient (mm <sup>-1</sup> )            | 2.19                                                                                             | 1.60                                                                                        |
| F(000)                                                | 708                                                                                              | 864                                                                                         |
| Index ranges                                          | h = -14 → 14<br>k = -17 → 17<br>l = -9 → 9                                                       | h = -12 → 12<br>k = -11 → 11<br>l = -19 → 19                                                |
| R <sub>int</sub>                                      | 0.036                                                                                            | 0.073                                                                                       |
| Reflections collected                                 | 38635                                                                                            | 26680                                                                                       |
| Independent reflections                               | 2380                                                                                             | 2887                                                                                        |
| Reflections observed [ <i>I</i> >2σ( <i>I</i> )]      | 2102                                                                                             | 2525                                                                                        |
| Θ range for data collection                           | 3.1 to 25.0°                                                                                     | 2.5 to 25.0°                                                                                |
| R [ <i>F</i> <sup>2</sup> >2σ <i>F</i> <sup>2</sup> ] | 0.025                                                                                            | 0.054                                                                                       |
| wR ( <i>F</i> <sup>2</sup> )                          | 0.059                                                                                            | 0.146                                                                                       |
| S                                                     | 1.14                                                                                             | 1.15                                                                                        |
| Parameters                                            | 168                                                                                              | 191                                                                                         |
| Δρ min (e Å <sup>-3</sup> )                           | -0.30                                                                                            | -1.37                                                                                       |
| Δρ max (e Å <sup>-3</sup> )                           | 0.44                                                                                             | 1.92                                                                                        |

**Table S2** Selected bond lengths (Å) and angles (°) for complexes [Cu(CPYA)Cl<sub>2</sub>] (**1**) and [Pd(CPYA)Cl<sub>2</sub>] (**2**).

| <i>Atom labels</i> | <b>1</b> (M = Cu) | <b>2</b> (M = Pd) |
|--------------------|-------------------|-------------------|
| M—N1               | 2.087(2)          | 2.081(5)          |
| M—N2               | 1.999(2)          | 2.040(5)          |
| M—C11              | 2.2524(7)         | 2.2979(18)        |
| M—C12              | 2.2645(7)         | 2.3142(17)        |
| N1—M—N2            | 82.40(8)          | 82.64(19)         |
| N1—M—C11           | 90.19(6)          | 90.43(14)         |
| N1—M—C12           | 177.28(6)         | 175.73(14)        |
| N2—M—C11           | 168.95(6)         | 172.64(14)        |
| N2—M—C12           | 95.03(6)          | 93.99(14)         |
| C11—M—C12          | 92.23(3)          | 93.04(6)          |
